# Supplementary material for: A multiresponsive two-arm ferrocene-based chemosensor molecule for selective detection of mercury
Source: Royal Society of Chemistry journal article supplement (doi:10.1039/b819778d), 2009-01-01
Supplement: b819778d.pdf [file b819778d.pdf]

## Electronic Supplementary Information

---

### **A multiresponsive two-arm ferrocene-based chemosensor molecule for selective detection of mercury**

---

**Tomás Romero, Antonio Caballero, Arturo Espinosa, Alberto Tárraga\* and Pedro Molina\***

*Departamento de Química Orgánica, Facultad de Química, Campus de Espinardo, Universidad de Murcia, E-30100, Spain. Fax: +34 968 364 149; Tel: +34 968 367 496; E-mail: pmolina@um, atarraga@um.es.*

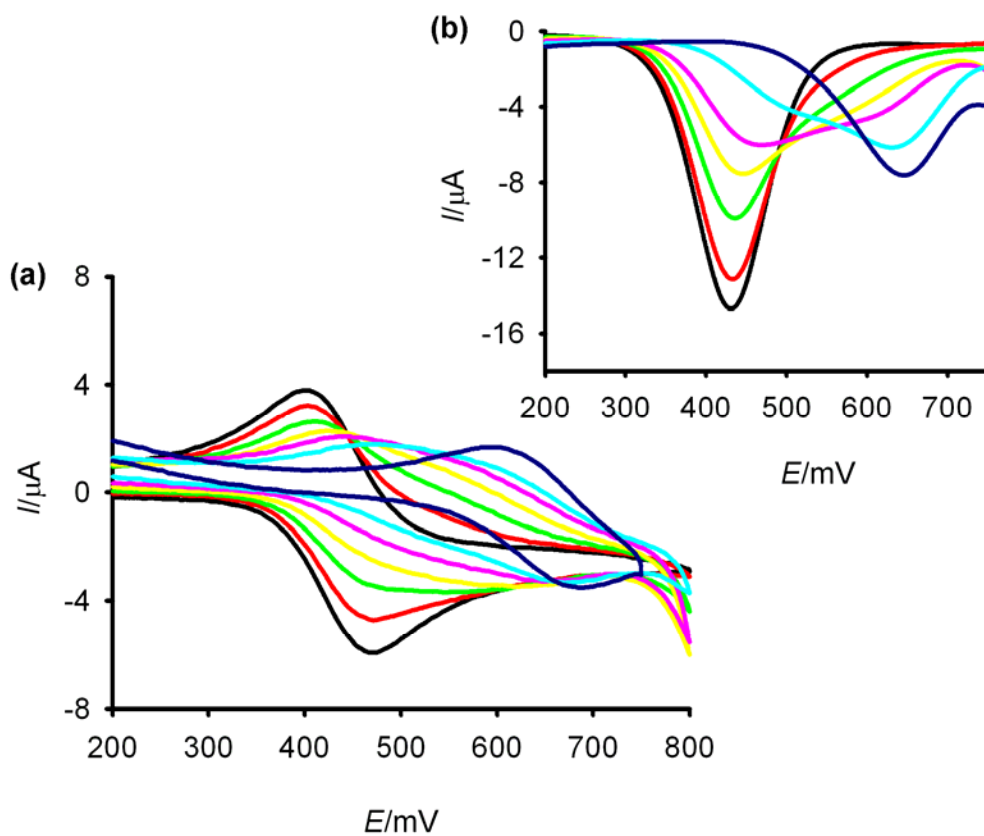

**Figure S1.** Evolution of the CV (a) and OSWV (b) of **4** ( $1 \times 10^{-3}$  M) in  $\text{CH}_3\text{CN}$  using  $[(n\text{-Bu})_4\text{N}]\text{PF}_6$  as supporting electrolyte when  $\text{Hg}(\text{OTf})_2$  is added: from 0 (black) to 1 equiv (deep blue).

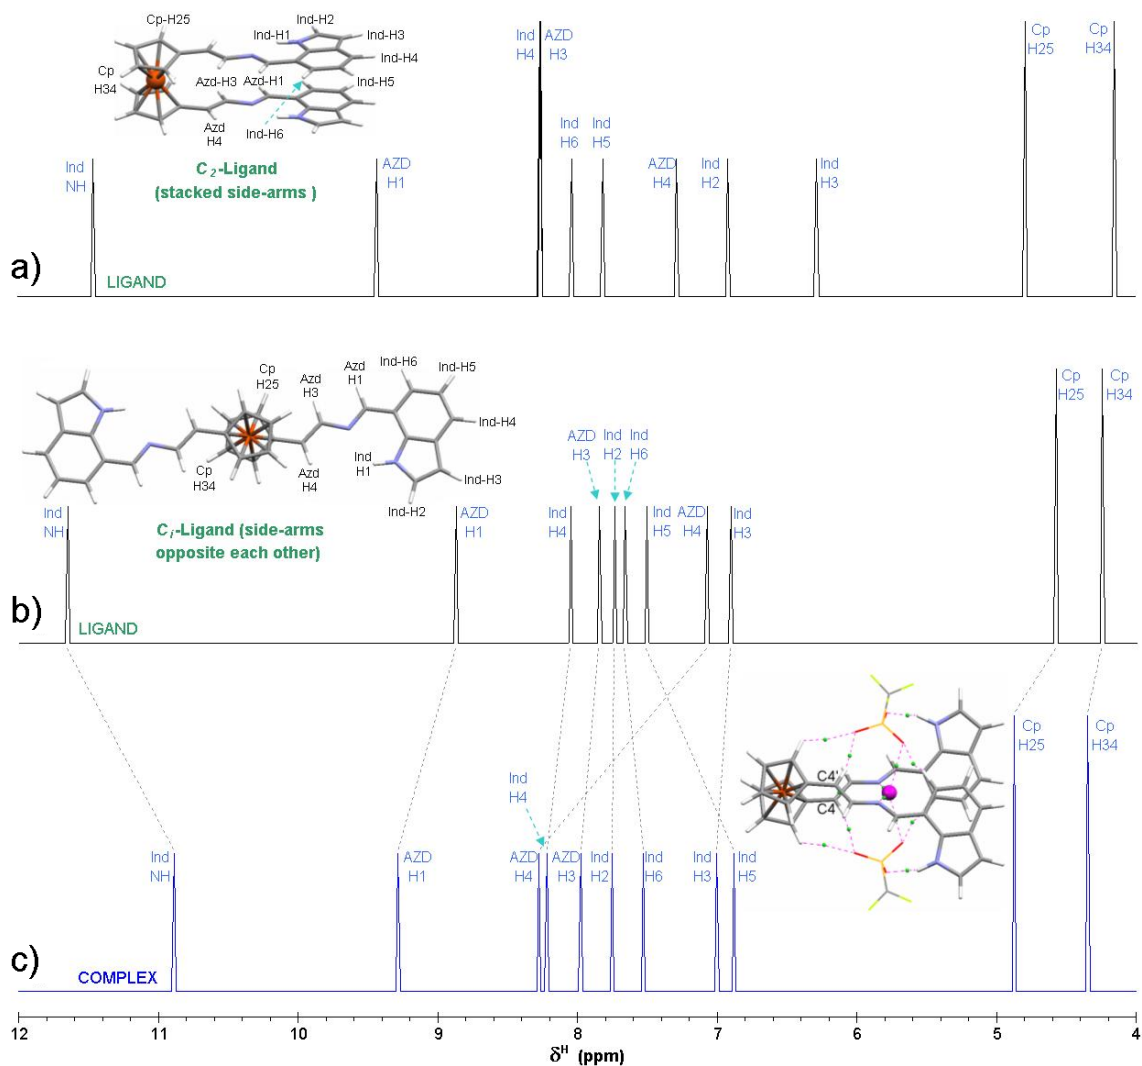

**Figure S2.** Calculated (GIAO/CPCM<sub>chloroform</sub>/B3LYP/aug6-311G\*\*/SDDecp // mPW1B95/aug6-311G\*\*/SDDecp) <sup>1</sup>H NMR spectra for the C<sub>2</sub>-stacked (a) and C<sub>i</sub> (b) conformers of ligand 4 and for the 4<sup>C<sub>2</sub>-st</sup>.Hg(OTf)<sub>2</sub> complex (c). Every signal is represented as a singlet with a height proportional to the number of equivalent nuclei

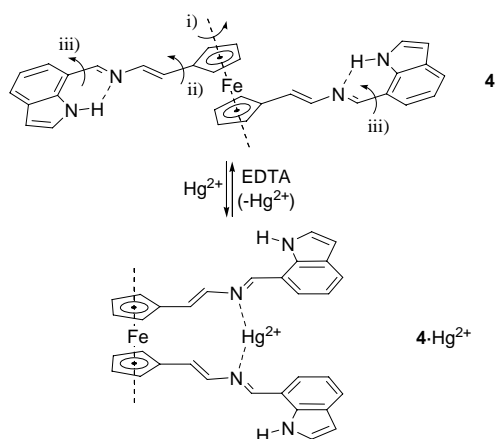

**Scheme S1.** Ligand motion on complexation

**Calculated structures:** cartesian coordinates (in Å) and energies (au) computed for  
Hg(OTf)<sub>2</sub>, compounds **4** and complex **4**·Hg(OTf)<sub>2</sub>.

**Hg(OTf)<sub>2</sub> (C<sub>i</sub>):**

E<sub>MeCN</sub> = -2076.803083 au

|    |            |            |             |   |             |             |             |
|----|------------|------------|-------------|---|-------------|-------------|-------------|
| Hg | 0.00000000 | 0.00000000 | 0.00000000  | O | -4.02850166 | -1.45706400 | -0.53379533 |
| O  | 2.06653316 | 0.00000000 | 0.00000000  | S | -2.67317671 | -1.49922080 | -0.00000000 |
| S  | 2.67317671 | 1.49922080 | 0.00000000  | O | -2.06653317 | 0.00000000  | -0.00000000 |
| O  | 4.02850165 | 1.45706400 | 0.53379533  | O | -1.64367212 | -2.43537922 | -0.48796019 |
| O  | 1.64367211 | 2.43537922 | 0.48796018  | C | -2.78656489 | -1.77760012 | 1.88319397  |
| C  | 2.78656489 | 1.77760012 | -1.88319397 | F | -3.16032496 | -3.03432310 | 2.12787952  |
| F  | 1.55310500 | 1.56460381 | -2.40583732 | F | -1.55310501 | -1.56460381 | 2.40583732  |
| F  | 3.16032496 | 3.03432310 | -2.12787952 | F | -3.65126902 | -0.92211152 | 2.42912718  |
| F  | 3.65126901 | 0.92211152 | -2.42912718 |   |             |             |             |

**Compound 4<sup>C2-st</sup>:**

E<sub>MeCN</sub> = -2717.969984 au

E<sub>gas-phase</sub> = -2717.979293 au

|    |            |             |             |   |             |             |             |
|----|------------|-------------|-------------|---|-------------|-------------|-------------|
| C  | 4.86834324 | 1.67190907  | 0.00000000  | H | 0.74110242  | -2.33944276 | 2.53751784  |
| C  | 5.85217141 | 1.72133114  | 1.05657236  | C | -1.08751725 | 2.15030638  | -1.37613297 |
| C  | 7.15564281 | 1.66617666  | 0.47137435  | C | -1.73196525 | 1.88712782  | -0.14493293 |
| C  | 6.99870431 | 1.55348322  | -0.94808102 | N | -1.18762422 | 1.57516282  | 1.07120252  |
| C  | 5.59833312 | 1.53868534  | -1.23963847 | C | -2.20461922 | 1.38168820  | 1.98981062  |
| H  | 5.62800809 | 1.80074752  | 2.11670053  | C | -3.41970726 | 1.58670130  | 1.37850642  |
| H  | 8.09823049 | 1.68129896  | 1.01061386  | C | -3.14986494 | 1.90736129  | 0.00690894  |
| H  | 7.80158917 | 1.46417898  | -1.67409533 | C | -3.94363867 | 2.18928350  | -1.11798291 |
| H  | 5.15792299 | 1.43890882  | -2.22741674 | C | -3.32531824 | 2.44254711  | -2.34417545 |
| Fe | 6.08083605 | 0.00000000  | 0.00000000  | C | -1.92887734 | 2.42445477  | -2.47168238 |
| C  | 4.86834324 | -1.67190907 | 0.00000000  | H | -0.18082519 | 1.47319734  | 1.19283656  |
| C  | 5.85217141 | -1.72133114 | -1.05657235 | H | -1.97483342 | 1.09767538  | 3.01062472  |
| C  | 7.15564281 | -1.66617666 | -0.47137434 | H | -4.39155688 | 1.49884129  | 1.85094557  |
| C  | 6.99870431 | -1.55348321 | 0.94808103  | H | -5.03112628 | 2.20771833  | -1.03559222 |
| C  | 5.59833312 | -1.53868534 | 1.23963847  | H | -3.93653392 | 2.66156262  | -3.21981583 |
| H  | 5.62800809 | -1.80074753 | -2.11670053 | H | -1.47070786 | 2.63215907  | -3.44055041 |
| H  | 8.09823049 | -1.68129895 | -1.01061386 | C | -1.08751725 | -2.15030639 | 1.37613296  |
| H  | 7.80158917 | -1.46417898 | 1.67409533  | C | -1.73196525 | -1.88712783 | 0.14493293  |
| H  | 5.15792299 | -1.43890882 | 2.22741674  | N | -1.18762422 | -1.57516283 | -1.07120253 |
| C  | 3.43505533 | 1.69516807  | 0.19051972  | C | -2.20461922 | -1.38168822 | -1.98981063 |
| C  | 2.51644050 | 1.90290187  | -0.78874888 | C | -3.41970725 | -1.58670132 | -1.37850643 |
| N  | 1.16128357 | 1.89058131  | -0.53122530 | C | -3.14986494 | -1.90736131 | -0.00690894 |
| C  | 0.34627640 | 2.13175380  | -1.52400360 | C | -3.94363867 | -2.18928351 | 1.11798290  |
| H  | 3.06241034 | 1.53311619  | 1.20454728  | C | -3.32531824 | -2.44254712 | 2.34417545  |
| H  | 2.84326774 | 2.09998974  | -1.82296523 | C | -1.92887734 | -2.42445478 | 2.47168238  |
| O  | 0.74110242 | 2.33944276  | -2.53751784 | H | -0.18082519 | -1.47319735 | -1.19283656 |
| C  | 3.43505533 | -1.69516807 | -0.19051972 | H | -1.97483342 | -1.09767540 | -3.01062473 |
| C  | 2.51644050 | -1.90290188 | 0.78874888  | H | -4.39155688 | -1.49884131 | -1.85094558 |
| N  | 1.16128357 | -1.89058132 | 0.53122530  | H | -5.03112628 | -2.20771834 | 1.03559221  |
| C  | 0.34627640 | -2.13175381 | 1.52400360  | H | -3.93653392 | -2.66156263 | 3.21981582  |
| H  | 3.06241034 | -1.53311620 | -1.20454728 | H | -1.47070786 | -2.63215908 | 3.44055041  |
| H  | 2.84326774 | -2.09998974 | 1.82296523  | X | 0.27855737  | 1.64758438  | 0.51661477  |

|   |             |             |             |   |             |             |             |
|---|-------------|-------------|-------------|---|-------------|-------------|-------------|
| X | 0.27855737  | -1.64758438 | -0.51661477 | X | -1.44597951 | 0.20977467  | -0.85701429 |
| X | -3.27176458 | -0.23194851 | 0.85522368  | X | -1.44597951 | -0.20977467 | 0.85701429  |
| X | -3.27176458 | 0.23194851  | -0.85522368 |   |             |             |             |

Compound **4<sup>Gi</sup>** :

$E_{\text{MeCN}} = -2717.970916$  au

$E_{\text{gas-phase}} = -2717.976489$  au

|    |             |             |             |   |             |             |             |
|----|-------------|-------------|-------------|---|-------------|-------------|-------------|
| C  | -0.71357338 | -1.00613139 | 1.65418872  | C | -5.73179947 | -4.50636248 | 2.14117382  |
| C  | 0.73025709  | -1.02279346 | 1.59832993  | C | -5.22348149 | -5.80745426 | 1.92131667  |
| C  | 1.20563730  | 0.32418352  | 1.61142346  | N | -3.93793397 | -6.20146892 | 1.66213498  |
| C  | 0.06661200  | 1.19239975  | 1.65344543  | C | -3.90491699 | -7.57731157 | 1.51353549  |
| C  | -1.11146833 | 0.38233068  | 1.66427728  | C | -5.17334968 | -8.08615079 | 1.67647599  |
| H  | 1.34285480  | -1.91911732 | 1.55283216  | C | -6.04122277 | -6.97444269 | 1.93971208  |
| H  | 2.24405045  | 0.63799349  | 1.55998282  | C | -7.41745224 | -6.82758957 | 2.18897476  |
| H  | 0.09357665  | 2.27803932  | 1.64169944  | C | -7.93769166 | -5.55056502 | 2.40861928  |
| H  | -2.13284543 | 0.75109795  | 1.66138680  | C | -7.11495424 | -4.41455251 | 2.38567886  |
| Fe | 0.00000000  | 0.00000000  | 0.00000000  | H | -3.18056569 | -5.52020241 | 1.60402837  |
| C  | 0.71357338  | 1.00613139  | -1.65418872 | H | -2.96962617 | -8.08370974 | 1.30200941  |
| C  | -0.73025709 | 1.02279346  | -1.59832993 | H | -5.45150663 | -9.13246532 | 1.61498259  |
| C  | -1.20563730 | -0.32418352 | -1.61142346 | H | -8.07175959 | -7.69992257 | 2.21060470  |
| C  | -0.06661200 | -1.19239975 | -1.65344543 | H | -9.00349931 | -5.43059307 | 2.60256103  |
| C  | 1.11146833  | -0.38233068 | -1.66427728 | H | -7.54885063 | -3.42866092 | 2.56151110  |
| H  | -1.34285480 | 1.91911732  | -1.55283216 | C | 5.73179947  | 4.50636248  | -2.14117382 |
| H  | -2.24405045 | -0.63799349 | -1.55998282 | C | 5.22348149  | 5.80745426  | -1.92131667 |
| H  | -0.09357665 | -2.27803932 | -1.64169944 | N | 3.93793397  | 6.20146892  | -1.66213498 |
| H  | 2.13284543  | -0.75109795 | -1.66138680 | C | 3.90491699  | 7.57731157  | -1.51353549 |
| C  | -1.55286826 | -2.18485682 | 1.66167100  | C | 5.17334968  | 8.08615079  | -1.67647599 |
| C  | -2.89132930 | -2.20873223 | 1.89669136  | C | 6.04122277  | 6.97444269  | -1.93971208 |
| N  | -3.60677841 | -3.38888779 | 1.88829308  | C | 7.41745224  | 6.82758957  | -2.18897476 |
| C  | -4.89208118 | -3.33408958 | 2.11943657  | C | 7.93769166  | 5.55056502  | -2.40861928 |
| H  | -1.05862354 | -3.14278394 | 1.48155405  | C | 7.11495424  | 4.41455251  | -2.38567886 |
| H  | -3.43665489 | -1.27533141 | 2.10987013  | H | 3.18056569  | 5.52020241  | -1.60402837 |
| H  | -5.38860747 | -2.36386013 | 2.31040923  | H | 2.96962617  | 8.08370974  | -1.30200941 |
| C  | 1.55286826  | 2.18485682  | -1.66167100 | H | 5.45150663  | 9.13246532  | -1.61498259 |
| C  | 2.89132930  | 2.20873223  | -1.89669136 | H | 8.07175959  | 7.69992257  | -2.21060470 |
| N  | 3.60677841  | 3.38888779  | -1.88829308 | H | 9.00349931  | 5.43059307  | -2.60256103 |
| C  | 4.89208118  | 3.33408958  | -2.11943657 | H | 7.54885063  | 3.42866092  | -2.56151110 |
| H  | 1.05862354  | 3.14278394  | -1.48155405 | X | -3.38831944 | -4.73704824 | 1.71599370  |
| H  | 3.43665489  | 1.27533141  | -2.10987013 | X | 3.38831944  | 4.73704824  | -1.71599370 |
| H  | 5.38860747  | 2.36386013  | -2.31040923 |   |             |             |             |

Complex **4·Hg(OTf)<sub>2</sub>** ( $C_2$ ):

$E_{\text{MeCN}} = -4794.835372$  au

$E_{\text{BSSE}} = 0.01323344$  au

|    |             |             |             |    |             |             |             |
|----|-------------|-------------|-------------|----|-------------|-------------|-------------|
| C  | 1.20649024  | 1.68249274  | 0.00000000  | C  | 7.10028758  | -2.72449542 | -1.47269462 |
| C  | 0.37841944  | 1.63222451  | -1.17631795 | C  | 7.97296437  | -2.84409087 | -2.57552829 |
| C  | -0.98486374 | 1.63557033  | -0.76532043 | N  | 7.71715899  | -2.68764815 | -3.91594473 |
| C  | -1.01640167 | 1.66351163  | 0.66283042  | C  | 8.90680126  | -2.85590802 | -4.61020457 |
| C  | 0.32736757  | 1.68276563  | 1.13702632  | C  | 9.91987450  | -3.16283391 | -3.74317324 |
| H  | 0.74635878  | 1.61035779  | -2.19383924 | C  | 9.35631256  | -3.14124559 | -2.42049242 |
| H  | -1.84608537 | 1.60520603  | -1.41981836 | C  | 9.87638500  | -3.28961787 | -1.12678782 |
| H  | -1.90565632 | 1.64995085  | 1.27948833  | C  | 9.03465531  | -3.12188956 | -0.02679127 |
| H  | 0.63643657  | 1.67485494  | 2.17402182  | C  | 7.67105590  | -2.84464977 | -0.18925645 |
| Fe | 0.00000000  | 0.00000000  | 0.00000000  | H  | 6.94094955  | -2.12316301 | -4.25834418 |
| C  | 1.20649024  | -1.68249274 | -0.00000000 | H  | 8.92417922  | -2.73949157 | -5.68488585 |
| C  | 0.37841944  | -1.63222451 | 1.17631795  | H  | 10.94852351 | -3.36582256 | -4.00682320 |
| C  | -0.98486374 | -1.63557033 | 0.76532042  | H  | 10.92791162 | -3.52234695 | -0.98010222 |
| C  | -1.01640167 | -1.66351163 | -0.66283042 | H  | 9.43114266  | -3.23302175 | 0.97778366  |
| C  | 0.32736757  | -1.68276563 | -1.13702632 | H  | 7.03199986  | -2.78842973 | 0.68572370  |
| H  | 0.74635878  | -1.61035779 | 2.19383924  | Hg | 5.55946593  | 0.00000000  | 0.00000000  |
| H  | -1.84608537 | -1.60520603 | 1.41981836  | O  | 6.55738803  | 0.50177927  | -2.12231298 |
| H  | -1.90565632 | -1.64995085 | -1.27948833 | S  | 5.56606503  | 0.53038504  | -3.26790596 |
| H  | 0.63643657  | -1.67485494 | -2.17402182 | O  | 5.79812519  | -0.52208080 | -4.27835546 |
| C  | 2.65987187  | 1.67566208  | -0.02399387 | O  | 4.17128527  | 0.70643223  | -2.81858049 |
| C  | 3.46886229  | 2.10193646  | 0.96622604  | C  | 6.01492923  | 2.12874132  | -4.10610508 |
| N  | 4.86457191  | 1.98325909  | 0.85778670  | F  | 5.17439468  | 2.36708825  | -5.11582197 |
| C  | 5.66553332  | 2.63257257  | 1.65185372  | F  | 7.26304302  | 2.07473264  | -4.57743246 |
| H  | 3.11920073  | 1.31336241  | -0.94257822 | F  | 5.92825997  | 3.13585167  | -3.22246216 |
| H  | 3.09461284  | 2.57379926  | 1.87465824  | O  | 6.55738801  | -0.50177927 | 2.12231298  |
| H  | 5.22118787  | 3.19320671  | 2.48172188  | S  | 5.56606501  | -0.53038504 | 3.26790596  |
| C  | 2.65987187  | -1.67566208 | 0.02399387  | O  | 5.79812516  | 0.52208080  | 4.27835547  |
| C  | 3.46886230  | -2.10193647 | -0.96622603 | O  | 4.17128525  | -0.70643223 | 2.81858048  |
| N  | 4.86457191  | -1.98325909 | -0.85778668 | C  | 6.01492919  | -2.12874132 | 4.10610509  |
| C  | 5.66553333  | -2.63257258 | -1.65185370 | F  | 5.17439463  | -2.36708825 | 5.11582196  |
| H  | 3.11920073  | -1.31336242 | 0.94257823  | F  | 7.26304298  | -2.07473264 | 4.57743247  |
| H  | 3.09461284  | -2.57379926 | -1.87465823 | F  | 5.92825993  | -3.13585167 | 3.22246216  |
| H  | 5.22118788  | -3.19320671 | -2.48172186 | X  | 5.20429741  | 1.05838178  | 0.43578264  |
| C  | 7.10028757  | 2.72449542  | 1.47269465  | X  | 5.20429741  | -1.05838178 | -0.43578263 |
| C  | 7.97296436  | 2.84409087  | 2.57552832  | X  | 2.67983990  | 0.00000001  | 0.00000001  |
| N  | 7.71715897  | 2.68764815  | 3.91594476  | X  | 6.06412785  | 0.26830185  | -1.15600162 |
| C  | 8.90680124  | 2.85590802  | 4.61020461  | X  | 6.06412784  | -0.26830185 | 1.15600163  |
| C  | 9.91987449  | 3.16283391  | 3.74317327  | X  | 6.53555618  | -1.50880847 | -4.22207527 |
| C  | 9.35631255  | 3.14124559  | 2.42049246  | X  | 6.53555615  | 1.50880847  | 4.22207528  |
| C  | 9.87638500  | 3.28961787  | 1.12678785  | X  | 3.58481159  | 1.07561973  | -1.66274113 |
| C  | 9.03465531  | 3.12188955  | 0.02679130  | X  | 3.58481158  | -1.07561972 | 1.66274112  |
| C  | 7.67105590  | 2.84464976  | 0.18925648  | X  | 6.83423737  | 1.78601709  | -1.19765280 |
| H  | 6.94094953  | 2.12316301  | 4.25834420  | X  | 6.83423736  | -1.78601709 | 1.19765281  |
| H  | 8.92417919  | 2.73949157  | 5.68488589  | X  | 6.56321339  | 2.89627487  | -1.77980927 |
| H  | 10.94852350 | 3.36582256  | 4.00682324  | X  | 6.56321336  | -2.89627487 | 1.77980928  |
| H  | 10.92791161 | 3.52234695  | 0.98010226  |    |             |             |             |
| H  | 9.43114267  | 3.23302175  | -0.97778366 |    |             |             |             |
| H  | 7.03199986  | 2.78842973  | -0.68572370 |    |             |             |             |
